# Supplementary material for: Procedural Outcomes in Patients Treated with Percutaneous Coronary Interventions within Chronic Total Occlusions Stratified by Gender
Source: MDPI journal article supplement (doi:10.3390/jcm11051419), 2022-03-04
Supplement: s1 [file s1]

**Table S1.** Risk factors for periprocedural death in patients treated with percutaneous coronary intervention within chronic total occlusion.

|                                             | OR     | 95% CI        | <i>P</i> -value | AUC  |
|---------------------------------------------|--------|---------------|-----------------|------|
| Age, per year                               | 1.065  | 1.018-1.109   | 0.007           | 0.69 |
| Gender, male vs. female                     | 0.333  | 0.132-0.839   | 0.022           | 0.62 |
| Weight, per kg                              | 0.965  | 0.939-0.993   | 0.016           | 0.66 |
| Diabetes mellitus                           | 3.579  | 1.412-9.075   | 0.008           | 0.65 |
| Previous PCI                                | 0.222  | 0.073-0.674   | 0.003           | 0.67 |
| Kidney disease                              | 6.029  | 2.145-16.948  | 0.004           | 0.61 |
| Killip class                                | 3.888  | 1.590-7.016   | 0.008           | 0.61 |
| Radial access site during angiogram         | 0.123  | 0.039-0.387   | <0.001          | 0.74 |
| Femoral access site during angiogram        | 8.529  | 2.713-26.813  | <0.001          | 0.74 |
| Radial access site during PCI               | 0.148  | 0.049-0.449   | <0.001          | 0.72 |
| Femoral access site during PCI              | 7.013  | 2.307-21.318  | <0.001          | 0.72 |
| Radial access site during angiogram or PCI  | 0.135  | 0.045-0.412   | <0.001          | 0.73 |
| Femoral access site during angiogram or PCI | 6.905  | 2.272-20.989  | 0.001           | 0.72 |
| LMWH during PCI                             | 13.148 | 5.081-34.020  | <0.001          | 0.67 |
| LMWH during angiogram or PCI                | 10.536 | 3.809-29.140  | <0.001          | 0.69 |
| Aspiration thrombectomy during PCI          | 31.494 | 7.083-140.026 | 0.001           | 0.55 |
| PCI within LMCA                             | 27.753 | 9.803-78.567  | <0.001          | 0.63 |
| TIMI after PCI                              | 0.610  | 0.428-0.841   | 0.002           | 0.69 |
| TIMI 3 grade flow after PCI                 | 0.145  | 0.048-0.442   | <0.001          | 0.72 |
| Dissection during angiogram                 | 18.993 | 2.425-148.759 | 0.048           | 0.53 |

|                                        |         |                |        |      |
|----------------------------------------|---------|----------------|--------|------|
| Cardiac arrest during angiogram        | 72.846  | 15.325-346.272 | <0.001 | 0.56 |
| Cardiac arrest during PCI              | 125.126 | 39.185-399.555 | <0.001 | 0.61 |
| Cardiac arrest during angiogram or PCI | 158.266 | 57.015-439.323 | <0.001 | 0.66 |

AUC: area under curve; CI: confidence interval; LMWH: low-molecular weight heparin; OR: odds ratio; PCI: percutaneous coronary intervention

**Table S2.** Risk factors for periprocedural complications in patients treated with percutaneous coronary intervention within chronic total occlusion.

|                                             | OR    | 95% CI        | P-value | AUC    |
|---------------------------------------------|-------|---------------|---------|--------|
| Gender, male vs. female                     | 0.651 | 0.512-0.826   | <0.001  | 0.54   |
| Weight, per kg                              | 0.989 | 0.982-0.996   | 0.002   | 0.55   |
| Arterial hypertension                       | 1.507 | 1.132-2.005   | 0.003   | 0.53   |
| Kidney disease                              | 1.766 | 1.211-2.576   | 0.006   | 0.52   |
| Killip class                                | 2.226 | 1.410-3.231   | 0.002   | 0.53   |
| Radial access site during angiogram         | 0.651 | 0.472-0.897   | 0.01    | 0.54   |
| Femoral access site during angiogram        | 1.616 | 1.172-2.227   | 0.004   | 0.55   |
| FFR use during angiogram                    | 2.475 | (1.141;5.370) | 0.042   | 0.51   |
| Radial access site during PCI               | 0.567 | (0.453;0.711) | <0.001  | 0.57   |
| Femoral access site during PCI              | 1.826 | (1.456;2.289) | <0.001  | 0.57   |
| Radial access site during angiogram or PCI  | 0.566 | (0.451;0.710) | <0.001  | 0.57   |
| Femoral access site during angiogram or PCI | 1.858 | (1.483;2.329) | <0.001  | 0.57   |
| Acetyl-salicylic acid during PCI            | 1.457 | (1.156;1.836) | 0.002   | 0.5424 |
| No P2Y12 during PCI                         | 0.692 | (0.552;0.868) | 0.001   | 0.5449 |
| Clopidogrel P2Y12 during PCI                | 1.310 | (1.040;1.648) | 0.023   | 0.5314 |
| LMWH during PCI                             | 2.792 | (1.955;3.986) | <0.001  | 0.5357 |
| ASA during angiogram or PCI                 | 1.612 | (1.231;2.111) | <0.001  | 0.5594 |
| Clopidogrel during angiogram or PCI         | 1.473 | (1.120;1.938) | 0.005   | 0.5481 |
| No P2Y12 during angiogram and PCI           | 0.563 | (0.423;0.750) | <0.001  | 0.5681 |
| LMWH during angiogram or PCI                | 2.849 | (1.966;4.129) | <0.001  | 0.5563 |

|                                    |       |                |        |        |
|------------------------------------|-------|----------------|--------|--------|
| IVUS use during PCI                | 1.983 | (1.126;3.495)  | 0.031  | 0.5102 |
| Aspiration thrombectomy during PCI | 6.258 | (2.824;13.865) | <0.001 | 0.5095 |
| IVUS use during angiogram or PCI   | 1.978 | (1.135;3.450)  | 0.027  | 0.5187 |
| PCI within proximal RCA            | 1.307 | (1.012;1.688)  | 0.044  | 0.5244 |
| PCI within LMCA                    | 8.316 | (5.521;12.526) | <0.001 | 0.5408 |
| PCI within distal LAD              | 3.067 | (1.765;5.327)  | <0.001 | 0.5150 |
| PCI within proximal Circumflex     | 1.458 | (1.037;2.049)  | 0.037  | 0.5180 |
| PCI within medial Circumflex       | 0.525 | (0.306;0.900)  | 0.01   | 0.5188 |
| Bifurcation                        | 1.521 | 1.060-2.184    | 0.03   | 0.5174 |
| PCI with drug-eluting stent        | 0.771 | 0.615-0.967    | 0.02   | 0.5318 |
| Implantation of $\geq 2$ stents    | 1.871 | 1.442-2.428    | <0.001 | 0.5498 |
| Implanted stent                    | 0.775 | 0.618-0.973    | 0.03   | 0.5307 |
| PCI with drug-eluting balloon      | 0.702 | 0.223-2.210    | 0.52   | 0.5025 |
| Total amount of contrast           | 1.002 | 1.002-1.003    | <0.001 | 0.5721 |
| TIMI grade after PCI               | 0.820 | 0.759-0.887    | <0.001 | 0.5804 |
| TIMI 3 grade flow after PCI        | 0.457 | 0.365-0.573    | <0.001 | 0.5945 |

AUC: area under curve; CI: confidence interval; LMWH: low-molecular weight heparin; OR:

odds ratio; PCI: percutaneous coronary intervention

**Table S3.** Predictors of procedural success expressed as TIMI flow grade 3 after the procedure in patients treated with percutaneous coronary intervention within chronic total occlusion.

|                                            | OR    | 95% CI        | <i>P</i> -value | AUC  |
|--------------------------------------------|-------|---------------|-----------------|------|
| Year of PCI                                | 0.975 | (0.957-0.993) | 0.007           | 0.51 |
| Age, per year                              | 0.991 | (0.988-0.995) | <0.001          | 0.52 |
| Gender, male vs. female                    | 0.828 | (0.764-0.896) | <0.001          | 0.51 |
| Weight, per kg                             | 0.996 | (0.994-0.999) | 0.001           | 0.52 |
| Diabetes mellitus                          | 0.906 | (0.838-0.978) | 0.012           | 0.51 |
| Prior myocardial infarction                | 0.857 | (0.800-0.917) | <0.001          | 0.52 |
| Prior PCI                                  | 0.819 | (0.764-0.877) | <0.001          | 0.52 |
| Prior CABG                                 | 0.594 | (0.527-0.668) | <0.001          | 0.52 |
| Arterial hypertension                      | 0.869 | (0.803-0.939) | <0.001          | 0.51 |
| Kidney failure                             | 0.738 | (0.643-0.847) | <0.001          | 0.51 |
| Radial access site during angiogram        | 1.156 | (1.043-1.280) | 0.006           | 0.51 |
| Femoral access site during angiogram       | 0.874 | (0.788-0.970) | 0.011           | 0.51 |
| IVUS use during angiogram                  | 1.792 | (0.989-3.246) | 0.043           | 0.50 |
| Radial access site during PCI              | 1.094 | (1.019-1.175) | 0.013           | 0.51 |
| Femoral access site during PCI             | 0.918 | (0.855-0.987) | 0.020           | 0.51 |
| Radial access site during angiogram or PCI | 1.088 | (1.012-1.170) | 0.023           | 0.51 |
| Femoral access during angiogram or PCI     | 0.919 | (0.856-0.988) | 0.021           | 0.51 |
| No P2Y12 during PCI                        | 0.653 | (0.608-0.701) | <0.001          | 0.55 |
| Ticagrelor P2Y12 during PCI                | 1.937 | (1.592-2.356) | <0.001          | 0.51 |
| Prasugrel P2Y12 during PCI                 | 1.944 | (0.968-3.905) | 0.047           | 0.50 |

|                                      |       |               |        |      |
|--------------------------------------|-------|---------------|--------|------|
| Clopidogrel P2Y12 during PCI         | 1.399 | (1.300-1.506) | <0.001 | 0.54 |
| UFH during PCI                       | 1.158 | (1.050-1.277) | 0.004  | 0.59 |
| Clopidogrel during angiogram or PCI  | 1.431 | (1.318-1.554) | <0.001 | 0.54 |
| Prasugrel during angiogram or PCI    | 1.905 | (0.948-3.828) | 0.055  | 0.50 |
| Ticagrelor during angiogram or PCI   | 1.918 | (1.573-2.339) | <0.001 | 0.52 |
| No P2Y12 during angiogram and PCI    | 0.621 | (0.573-0.674) | <0.001 | 0.56 |
| UFH during angiogram or PCI          | 1.289 | (1.124-1.479) | <0.001 | 0.51 |
| IVUS during PCI                      | 3.468 | (2.512-4.787) | <0.001 | 0.51 |
| OCT during PCI                       | 3.190 | (1.577-6.453) | <0.001 | 0.50 |
| Rotablation during PCI               | 5.282 | (2.985-9.345) | <0.001 | 0.50 |
| IVUS during angiogram or PCI         | 3.022 | (2.251-4.056) | <0.001 | 0.52 |
| OCT during angiogram or PCI          | 3.012 | (1.588-5.712) | <0.001 | 0.50 |
| PCI within right coronary artery     | 0.816 | (0.761-0.874) | <0.001 | 0.52 |
| PCI within proximal RCA              | 0.831 | (0.766-0.901) | <0.001 | 0.52 |
| PCI within medial RCA                | 1.412 | (1.295-1.540) | <0.001 | 0.53 |
| PCI within distal RCA                | 2.333 | (2.036-2.673) | <0.001 | 0.53 |
| PCI within RPDA                      | 2.957 | (1.896-4.610) | <0.001 | 0.50 |
| PCI within RPAV                      | 2.199 | (1.503-3.217) | <0.001 | 0.50 |
| PCI within left main coronary artery | 2.247 | (1.584-3.188) | <0.001 | 0.50 |
| PCI within LAD                       | 1.510 | (1.395-1.636) | <0.001 | 0.54 |
| PCI within proximal LAD              | 1.639 | (1.482-1.813) | <0.001 | 0.53 |
| PCI within medial LAD                | 1.596 | (1.434-1.777) | <0.001 | 0.52 |
| PCI within distal LAD                | 2.681 | (1.891-3.800) | <0.001 | 0.51 |
| PCI within 1 <sup>st</sup> diagonal  | 2.799 | (2.120-3.695) | <0.001 | 0.51 |

|                                          |        |                 |        |      |
|------------------------------------------|--------|-----------------|--------|------|
| PCI within circumflex artery             | 1.154  | (1.054-1.265)   | 0.002  | 0.51 |
| PCI within proximal circumflex           | 1.165  | (1.032-1.315)   | 0.013  | 0.51 |
| PCI within medial circumflex             | 1.269  | (1.116-1.443)   | <0.001 | 0.51 |
| PCI within distal circumflex             | 1.484  | (1.090-2.020)   | 0.01   | 0.50 |
| PCI within 1st obtuse marginal           | 1.405  | (1.189-1.661)   | <0.001 | 0.51 |
| PCI within ramus intermedius             | 1.894  | (1.301-2.756)   | <0.001 | 0.50 |
| PCI within saphenous vein graft          | 0.599  | (0.432-0.831)   | 0.002  | 0.50 |
| PCI within Bifurcation                   | 2.322  | (1.991-2.707)   | <0.001 | 0.52 |
| PCI with drug eluting stent              | 69.061 | (61.594-77.433) | <0.001 | 0.89 |
| PCI with bioresorbable vascular scaffold | 24.481 | (6.032-99.359)  | <0.001 | 0.50 |
| PCI with bare metal stent                | 3.441  | (2.275-5.203)   | <0.001 | 0.51 |
| PCI with $\geq 2$ stents                 | 16.507 | (13.284-20.511) | <0.001 | 0.60 |
| Implanted stent                          | 81.155 | (72.335-91.051) | <0.001 | 0.90 |
| PCI with drug eluting balloon            | 2.614  | (1.798-3.800)   | <0.001 | 0.51 |
| No-reflow during PCI                     | 0.097  | (0.045-0.206)   | <0.001 | 0.50 |
| Coronary artery perforation during PCI   | 0.315  | (0.210-0.474)   | <0.001 | 0.50 |
| Death during PCI                         | 0.146  | (0.048-0.442)   | <0.001 | 0.50 |

AUC: area under curve; CI: confidence interval; LMWH: low-molecular weight heparin; OR:

odds ratio; PCI: percutaneous coronary intervention
